# Supplementary material for: Selenoprotein K deficiency inhibits melanoma by reducing calcium flux required for tumor growth and metastasis
Source: PubMed Central journal article supplement (PMC5862587; doi:10.18632/oncotarget.24388), 2018-02-03
Supplement: oncotarget-09-13407-s001.pdf [file oncotarget-09-13407-s001.pdf]

# Selenoprotein K deficiency inhibits melanoma by reducing calcium flux required for tumor growth and metastasis

## SUPPLEMENTARY MATERIALS

Selenoprotein K immunohistology results

| Patients with localized malignant melanoma | Patient 1 | Patient 2 | Patient 3 | Patient 4 | Patient 5 |
|--------------------------------------------|-----------|-----------|-----------|-----------|-----------|
| Normal tissue                              | 1         | 1         | 1         | 0         | 0         |
| Tumor tissue                               | 1         | 1         | 0         | 0         | 0         |

| Patients with distant or regional metastatic melanoma | Patient 1 | Patient 2 | Patient 3 | Patient 4 | Patient 5 |
|-------------------------------------------------------|-----------|-----------|-----------|-----------|-----------|
| Normal tissue                                         | 0         | 1         | 0         | 1         | 0         |
| Tumor tissue                                          | 0         | 1         | 0         | 1         | 0         |

Glutathione peroxidase 1 immunohistology results

| Patients with localized malignant melanoma | Patient 1 | Patient 2 | Patient 3 | Patient 4 | Patient 5 |
|--------------------------------------------|-----------|-----------|-----------|-----------|-----------|
| Normal tissue                              | 2         | 2         | 2         | 1         | 2         |
| Tumor tissue                               | 2         | 2         | 2         | 2         | 2         |

| Patients with distant or regional metastatic melanoma | Patient 1 | Patient 2 | Patient 3 | Patient 4 | Patient 5 |
|-------------------------------------------------------|-----------|-----------|-----------|-----------|-----------|
| Normal tissue                                         | 2         | 2         | 1         | 1         | 2         |
| Tumor tissue                                          | 2         | 2         | 1         | 1         | 2         |

Glutathione peroxidase 4 immunohistology results

| Patients with localized malignant melanoma | Patient 1 | Patient 2 | Patient 3 | Patient 4 | Patient 5 |
|--------------------------------------------|-----------|-----------|-----------|-----------|-----------|
| Normal tissue                              | 1         | 2         | 1         | 1         | 1         |
| Tumor tissue                               | 2         | 2         | 1         | 1         | 1         |

| Patients with distant or regional metastatic melanoma | Patient 1 | Patient 2 | Patient 3 | Patient 4 | Patient 5 |
|-------------------------------------------------------|-----------|-----------|-----------|-----------|-----------|
| Normal tissue                                         | 1         | 1         | 1         | 1         | 1         |
| Tumor tissue                                          | 2         | 2         | 1         | 2         | 1         |

**Scale**

- 0 Negative
- 1 Positive - Weak in at least 25% of the cells
- 2 Positive - Medium in at least 25% of the cells
- 3 Positive - Strong in at least 25% of the cells

**Supplementary Figure 1: Results from immunohistochemical (IHC) evaluation of early and late stage melanoma tissues obtained from the University of Hawaii Cancer Center (UHCC).** IHC was performed and scored by the UHCC Pathology core for SELENOK along with two other selenoproteins, glutathione peroxidase-1 and -4. Results suggest no changes in SELENOK levels in tumor tissues compared to normal tissue.

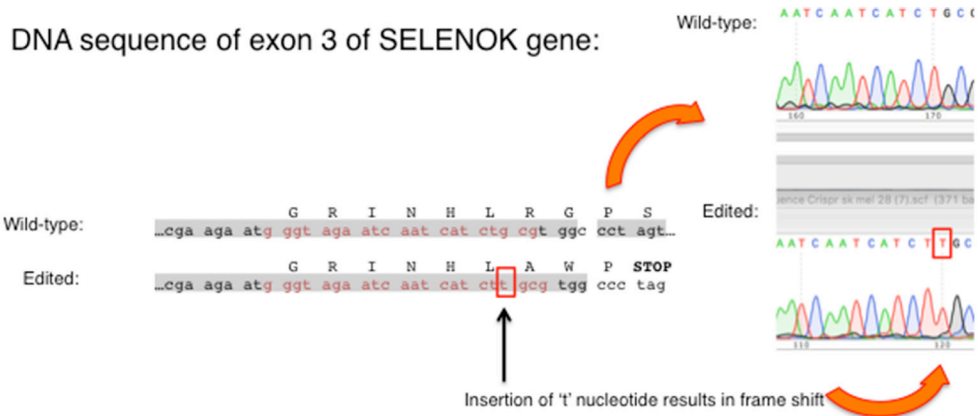

Protein resulting from gene editing:

Wild-type: 1 M V Y I S N G Q V L D S R S Q S P W R L S L I T D F F W G I A E F V V L F F K T L L Q Q D V K K R R S Y G N S S D S R Y D D G R G P P G N P P R R M G R I N H L R G P S P P P M A G G U G R 94

Edited: 1 M V Y I S N G Q V L D S R S Q S P W R L S L I T D F F W G I A E F V V L F F K T L L Q Q D V K K R R S Y G N S S D S R Y D D G R G P P G N P P R R M G R I N H L **AWP** 80-83

**Supplementary Figure 2: Sanger sequencing results for edited clones compared to w.t. SK-MEL-28 melanoma cells.** CRISPR/Cas9 editing led to introduction of a thymidine nucleotide causing a frame shift in DNA. This resulted in altered codons corresponding to amino acids 80–83 followed by a stop codon leading to a truncated SELENOK protein lacking the functional domain.

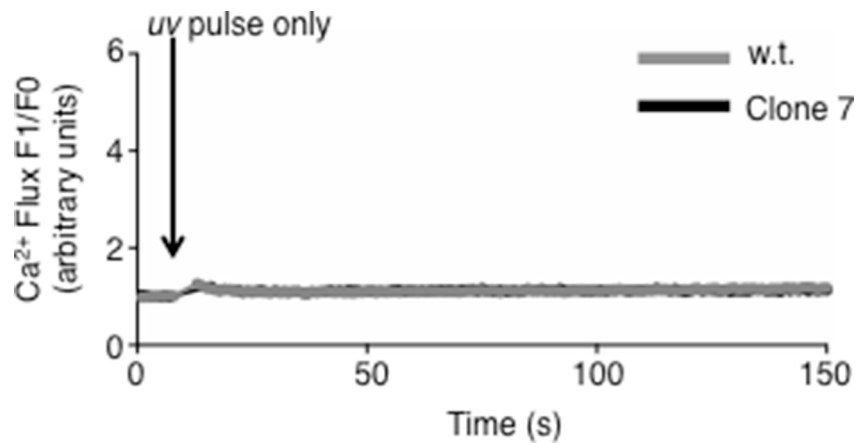

**Supplementary Figure 3: SELENOK-deficient cells (Clone 7) compared to wild-type SK-MEL-28 cells were loaded with FuraRed along with no caged IP3 to determine effects of the 2 s uv pulse on Ca<sup>2+</sup> flux.** No caged IP3 showed minimal Ca<sup>2+</sup> flux, which indicates uv alone does not induce a response.

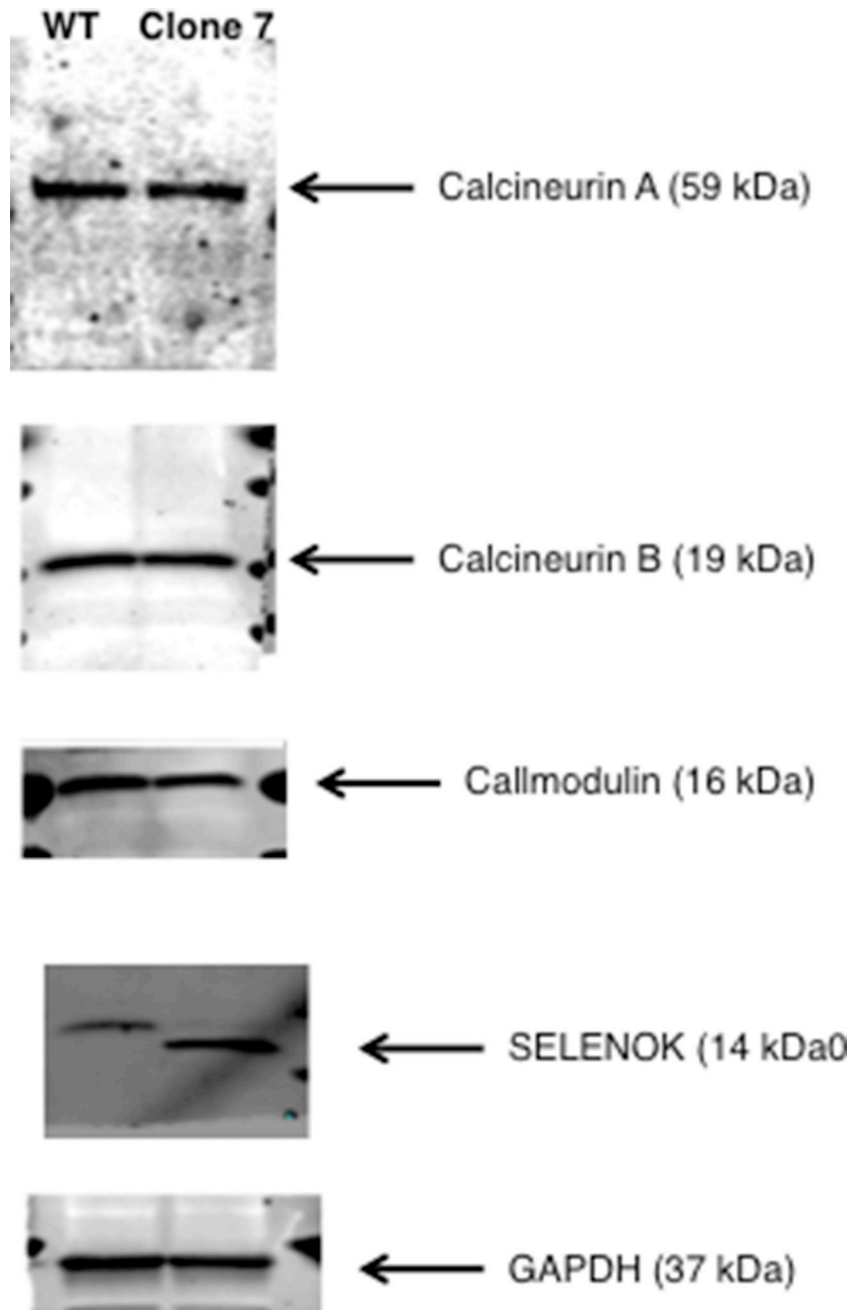

**Supplementary Figure 4: Western blotting was performed to determine levels of calcineurin subunits A and B, along with calmodulin in SELENOK-deficient cells (Clone 7) compared to wild-type SK-MEL-28 cells. Results showed no differences. SELENOK was detected in Clone 7 cells as a smaller truncated form as expected and GAPDH was used as a loading control.**

| GeneSymbol   | Fold Change | FDR-adjusted p-value | Average Expression for KO (N=3) | Average Expression for Wild Type (N=3) | GeneSymbol  | Fold Change | FDR-adjusted p-value | Average Expression for KO (N=3) | Average Expression for Wild Type (N=3) | GeneSymbol      | Fold Change | FDR-adjusted p-value | Average Expression for KO (N=3) | Average Expression for Wild Type (N=3) | GeneSymbol    | Fold Change | FDR-adjusted p-value | Average Expression for KO (N=3) | Average Expression for Wild Type (N=3) |
|--------------|-------------|----------------------|---------------------------------|----------------------------------------|-------------|-------------|----------------------|---------------------------------|----------------------------------------|-----------------|-------------|----------------------|---------------------------------|----------------------------------------|---------------|-------------|----------------------|---------------------------------|----------------------------------------|
| ADRL2        | 2.2807      | 0.0237               | 8.2676                          | 7.0781                                 | SPF1        | 5.7314      | 0.0072               | 11.3714                         | 545.25                                 | MALON           | 0.3461      | 0.0253               | 7.7446                          | 5.1014                                 | MEZ10L        | -2.9445     | 0.0363               | 5.1759                          | 6.7379                                 |
| DCAF6        | 2.0594      | 0.0205               | 8.9599                          | 8.8184                                 | PPARGC1A    | 2.1654      | 0.0297               | 8.7152                          | 7.6006                                 | NKX3            | 2.7462      | 0.03                 | 7.4283                          | 6.1201                                 | SRSF12        | -3.0703     | 0.0108               | 7.6216                          | 9.24                                   |
| ATP1B1       | 2.1094      | 0.0139               | 9.9843                          | 8.9074                                 | FGRP2       | 3.1926      | 0.0373               | 8.0571                          | 6.3824                                 | AHNAK2          | 2.5997      | 0.0213               | 8.0619                          | 6.6836                                 | SNF12         | -5.562      | 0.0237               | 5.4255                          | 7.929                                  |
| DNM3         | 2.6882      | 0.0247               | 5.9884                          | 4.5618                                 | TUBE        | 3.8531      | 0.025                | 6.7374                          | 4.7914                                 | GABRA5          | 6.0134      | 0.018                | 8.5406                          | 5.9924                                 | AMPH          | -2.566      | 0.0313               | 6.3068                          | 7.6663                                 |
| PRPL         | 2.1109      | 0.0247               | 8.1336                          | 7.0528                                 | ITGA2       | 2.0767      | 0.0157               | 8.1925                          | 7.1568                                 | ATP12A          | 2.399       | 0.016                | 8.8294                          | 7.5669                                 | FABP5         | -2.317      | 0.0112               | 7.9223                          | 9.1346                                 |
| DIRX3        | 2.7438      | 0.0131               | 8.1398                          | 7.6837                                 | OCN         | 2.1735      | 0.0261               | 7.0974                          | 5.9794                                 | CCPG1/MIR62     | 2.0943      | 0.0346               | 9.1202                          | 8.0676                                 | RMS2          | -2.155      | 0.0007               | 4.7543                          | 5.862                                  |
| KONK2        | 2.1077      | 0.0217               | 7.2297                          | 6.148                                  | ERAP2       | 4.1572      | 0.0155               | 8.6709                          | 6.6159                                 | ZDHHC1          | 3.577       | 0.043                | 6.6963                          | 4.7975                                 | EGR3          | -2.9975     | 0.0174               | 6.9383                          | 8.4921                                 |
| EPHX1        | 2.0405      | 0.0101               | 10.2105                         | 9.1876                                 | CYBP2       | 2.248       | 0.0244               | 8.008                           | 6.8939                                 | GPRC5B          | 2.505       | 0.0298               | 7.9126                          | 6.5877                                 | TRPA1         | -2.2263     | 0.0461               | 6.0457                          | 7.2004                                 |
| UGALS8       | 2.6707      | 0.0072               | 9.0015                          | 8.1843                                 | AMND3       | 2.8832      | 0.0225               | 8.1398                          | 6.6058                                 | GPRC5B          | 2.505       | 0.0298               | 7.9126                          | 6.5877                                 | ECT1/JIP3/wia | -2.8109     | 0.0386               | 6.2572                          | 7.4866                                 |
| NEURL        | 3.9401      | 0.0179               | 7.9407                          | 5.9685                                 | EPHA14A     | 4.9126      | 0.0323               | 5.3885                          | 6.1779                                 | SEPT4           | 6.2849      | 0.0022               | 8.8872                          | 6.2425                                 | HACD4         | -3.1423     | 0.0174               | 7.7297                          | 8.9255                                 |
| TNXP         | 2.3673      | 0.0101               | 11.0101                         | 9.7669                                 | NMIS        | 3.4101      | 0.0179               | 5.5883                          | 3.8184                                 | COG8            | 2.4689      | 0.0174               | 12.5952                         | 11.2313                                | SHB           | -3.0477     | 0.0174               | 7.5115                          | 9.1825                                 |
| CTSK         | 2.4215      | 0.0155               | 10.8837                         | 9.6078                                 | ATP6AP1     | 2.1013      | 0.0301               | 9.1171                          | 8.0458                                 | RAB27B          | 2.7412      | 0.0173               | 8.4089                          | 6.9541                                 | MACA          | -3.4543     | 0.0247               | 5.8037                          | 7.9291                                 |
| SPRKO        | 3.8653      | 0.0072               | 10.079                          | 8.3224                                 | RG1         | 2.1416      | 0.0108               | 8.619                           | 7.5204                                 | CDH7            | 2.576       | 0.0131               | 7.8469                          | 6.473                                  | TRIO          | -4.7452     | 0.0198               | 4.2428                          | 6.6499                                 |
| SPR2B        | 2.1712      | 0.094                | 6.7853                          | 5.6768                                 | NRN1        | 2.174       | 0.0369               | 10.8692                         | 9.2988                                 | CHST9           | 6.4049      | 0.0136               | 6.4623                          | 8.9392                                 | LOHRE3        | -13.8236    | 0.0131               | 4.8888                          | 8.6244                                 |
| S100A6       | 3.9477      | 0.0165               | 8.1262                          | 6.1823                                 | GPR63       | 2.004       | 0.0192               | 5.6917                          | 4.6888                                 | CHD19           | 3.4669      | 0.0158               | 7.1682                          | 5.3748                                 | WNK3          | -2.5889     | 0.0138               | 5.1755                          | 6.5478                                 |
| SLAMP9       | 3.1588      | 0.0252               | 9.0723                          | 7.4129                                 | FSO1        | 2.5297      | 0.0182               | 9.2712                          | 7.9922                                 | GDF15           | 4.9795      | 0.0049               | 11.7208                         | 9.412                                  | TSKAN7        | -2.2004     | 0.0242               | 8.0047                          | 9.1625                                 |
| GPR161       | 2.0655      | 0.0363               | 9.098                           | 8.0497                                 | ABCS5       | 6.7511      | 0.0172               | 11.4479                         | 8.6921                                 | FOXO3/MIR68     | 6.8627      | 0.0042               | 12.6988                         | 9.321                                  | MGMT          | -2.4919     | 0.0205               | 5.1718                          | 6.4891                                 |
| ONX3         | 2.0396      | 0.0232               | 7.7807                          | 6.7524                                 | BIS5        | 2.0751      | 0.027                | 9.0265                          | 7.9847                                 | CD22/MIR313     | 2.2476      | 0.0438               | 8.7195                          | 7.5514                                 | DEPDC7        | -2.0255     | 0.0255               | 4.5146                          | 6.4928                                 |
| CNH3         | 5.0007      | 0.0077               | 9.7801                          | 7.2944                                 | ADAM22      | 2.422       | 0.0239               | 8.0015                          | 6.7253                                 | KCN3            | 2.2405      | 0.0049               | 10.8491                         | 9.6653                                 | SORCS1        | -2.1483     | 0.0131               | 7.4842                          | 8.5874                                 |
| F11R         | 2.3484      | 0.0108               | 10.0395                         | 8.8078                                 | STEAP2      | 6.1635      | 0.0217               | 6.8075                          | 4.8607                                 | SEMA6B          | 2.4734      | 0.0215               | 8.3994                          | 7.0329                                 | ZNF215        | -2.725      | 0.012                | 6.2579                          | 7.72                                   |
| INTG2        | 2.3673      | 0.0108               | 9.3963                          | 8.1409                                 | GNGL1       | 2.3845      | 0.0072               | 8.9912                          | 7.9681                                 | OLFML2          | 2.0216      | 0.0213               | 8.3136                          | 7.2981                                 | HITAP2        | -2.0274     | 0.0292               | 8.344                           | 9.3636                                 |
| CDK15        | 3.009       | 0.0101               | 6.5941                          | 5.0439                                 | SUC6A4      | 3.8058      | 0.0039               | 7.2559                          | 5.5312                                 | BST2            | 6.456       | 0.0131               | 9.4402                          | 6.7491                                 | DEPDC7        | -2.0255     | 0.0292               | 6.4523                          | 7.4706                                 |
| MAP2         | 2.7741      | 0.0097               | 9.473                           | 8.001                                  | MET         | 3.4631      | 0.0143               | 10.0025                         | 8.1514                                 | PLAUR           | 2.1155      | 0.0102               | 10.6004                         | 9.5199                                 | NTRM          | -10.4911    | 0.0012               | 4.851                           | 8.2421                                 |
| MGATA4       | 2.8695      | 0.0168               | 8.267                           | 7.4729                                 | CVL         | 2.5626      | 0.0072               | 9.0785                          | 8.1512                                 | ZNF776          | 2.0375      | 0.0207               | 7.6075                          | 6.7808                                 | IFITM3        | -4.0026     | 0.0027               | 9.2065                          | 11.2289                                |
| ZRANB3       | 2.3676      | 0.0491               | 6.1154                          | 5.4741                                 | PCLO        | 2.134       | 0.024                | 9.0218                          | 7.9283                                 | C79103//RPS-5   | 8.1156      | 0.005                | 7.301                           | 6.2615                                 | PHLDA2        | -2.2258     | 0.0166               | 7.787                           | 8.9141                                 |
| GPR135       | 2.7864      | 0.0197               | 9.2266                          | 7.7462                                 | SANDR1      | 2.6725      | 0.0127               | 8.8294                          | 7.8298                                 | FT27            | 2.0889      | 0.0409               | 7.9612                          | 6.9182                                 | MPPEO2        | -2.6001     | 0.0312               | 5.8669                          | 7.4992                                 |
| TRP          | 2.0291      | 0.0294               | 8.8615                          | 8.8615                                 | DKI         | 2.3657      | 0.0174               | 6.9662                          | 6.9662                                 | ZNF644          | 2.1811      | 0.0293               | 4.2165                          | 3.8095                                 | FABP5         | -2.1638     | 0.011                | 6.9339                          | 8.0468                                 |
| HIBCH        | 2.2895      | 0.0449               | 9.0288                          | 7.8338                                 | KAA1147     | 2.0439      | 0.0362               | 8.4954                          | 7.4641                                 | ZNF546          | 2.3653      | 0.0303               | 7.1851                          | 5.9553                                 | SFI           | -2.1936     | 0.0431               | 6.8595                          | 7.4927                                 |
| KLF7         | 2.1725      | 0.0128               | 10.2687                         | 9.1493                                 | ZDHHC2      | 4.5963      | 0.0257               | 7.0611                          | 6.0028                                 | ZYG11A          | -2.6911     | 0.0152               | 4.2347                          | 5.6646                                 | STYL2         | -2.4785     | 0.0072               | 9.3041                          | 10.1628                                |
| EMR          | 4.1777      | 0.0072               | 7.9328                          | 5.8755                                 | MATN2       | 3.2426      | 0.0248               | 7.5443                          | 5.9472                                 | EDARAD          | -2.4679     | 0.037                | 4.8462                          | 6.1495                                 | MMV1          | -13.4407    | 0.0108               | 7.9676                          | 11.7892                                |
| TTN          | 2.0928      | 0.0308               | 7.8677                          | 6.9223                                 | NOV         | 2.8049      | 0.0191               | 8.6448                          | 7.1569                                 | ERH2            | -2.4075     | 0.0245               | 5.9842                          | 7.2637                                 | IFITM2        | -2.9441     | 0.0165               | 7.9113                          | 8.8892                                 |
| TMEM45A      | 2.4449      | 0.0116               | 9.3116                          | 8.0218                                 | PSCA        | 3.5805      | 0.0128               | 8.0015                          | 7.0015                                 | TMOC4           | -2.8551     | 0.0108               | 6.617                           | 8.1306                                 | IFITM1        | -2.2926     | 0.0211               | 6.6046                          | 7.7802                                 |
| CD96         | 2.9951      | 0.0182               | 5.2436                          | 3.9834                                 | CSGALNACT1  | 2.0664      | 0.0414               | 7.1794                          | 6.1322                                 | RAP1GAP         | -3.8761     | 0.0108               | 5.2549                          | 7.2035                                 | SPX           | -2.4295     | 0.0232               | 3.7321                          | 5.0127                                 |
| EPSEC        | 2.0621      | 0.0049               | 9.3415                          | 8.2534                                 | CLU/MIR6841 | 2.1107      | 0.0155               | 6.1345                          | 5.0568                                 | IAPTM5          | -2.352      | 0.0405               | 6.2283                          | 7.4702                                 | ONTN1         | -2.6048     | 0.0329               | 7.9974                          | 9.3785                                 |
| NEK1         | 2.255       | 0.019                | 6.0446                          | 4.8714                                 | ENPP2       | 3.251       | 0.0168               | 6.8265                          | 6.5534                                 | SNSL1           | -2.2867     | 0.0397               | 4.3889                          | 6.4996                                 | TRK1D4        | -2.366      | 0.038                | 6.625                           | 8.9849                                 |
| PPP2R3A      | 2.6855      | 0.0139               | 9.3027                          | 7.8775                                 | NDRG1       | 2.6091      | 0.0077               | 10.0125                         | 8.6289                                 | HENMT1          | -3.776      | 0.0279               | 5.7262                          | 7.6431                                 | SLCS8A1       | -10.0496    | 0.0108               | 3.3034                          | 6.5325                                 |
| SUCNR1       | 3.5176      | 0.0101               | 5.0813                          | 2.1392                                 | XCR9        | 2.1392      | 0.0239               | 6.1571                          | 5.06                                   | CTSL            | -2.0543     | 0.0143               | 6.0088                          | 7.0774                                 | TRPV4         | -3.3185     | 0.0101               | 8.9501                          | 10.6006                                |
| WVE          | 2.1991      | 0.049                | 9.9928                          | 8.8559                                 | ROBB        | 2.5193      | 0.0113               | 9.1196                          | 7.7666                                 | RORG            | -2.4538     | 0.0174               | 8.3152                          | 8.6102                                 | LINC00082     | -2.8412     | 0.0389               | 8.624                           | 10.1305                                |
| KCNMB1       | 2.1249      | 0.0174               | 8.3712                          | 7.2827                                 | NARF1       | 2.27        | 0.0155               | 7.7864                          | 6.5858                                 | ///RNF202-ZNF69 | -3.0227     | 0.0108               | 6.1316                          | 7.861                                  | TRK1D4        | -2.366      | 0.038                | 6.625                           | 8.9849                                 |
| GPR160       | 3.1847      | 0.0185               | 7.7971                          | 6.1291                                 | GKAP1       | 2.3945      | 0.0108               | 8.4521                          | 3.6421                                 | KHL29           | -4.5666     | 0.0166               | 4.8299                          | 7.0205                                 | DNAJC15       | -6.8111     | 0.007                | 7.3472                          | 10.1151                                |
| NLGN1        | 2.1464      | 0.0131               | 8.9607                          | 8.5048                                 | BAAT        | 10.3718     | 0.0131               | 8.7009                          | 4.6563                                 | ARHGAP25        | -2.287      | 0.0367               | 7.1085                          | 8.302                                  | CRP2          | -2.0263     | 0.0149               | 7.4465                          | 8.4453                                 |
| LMN1         | 2.4709      | 0.017                | 9.5689                          | 8.2639                                 | IS          | 2.4045      | 0.0252               | 7.4229                          | 6.1846                                 | POTEE           | -7.423      | 0.0132               | 3.867                           | 6.8947                                 | FLVCR2        | -2.1534     | 0.0389               | 5.1418                          | 6.2477                                 |
| OSBPL10      | 4.81        | 0.012                | 9.3677                          | 7.017                                  | PODS        | 2.4344      | 0.0232               | 7.1669                          | 5.6834                                 | BOSAL1          | -2.2867     | 0.0397               | 4.3889                          | 6.4996                                 | ENAHM         | -2.767      | 0.0257               | 6.2322                          | 7.2006                                 |
| CAFP5        | 6.2635      | 0.0072               | 9.2566                          | 6.6086                                 | HTRC2       | 2.2822      | 0.0492               | 6.4228                          | 5.2324                                 | CERS6           | -2.2632     | 0.0414               | 7.7863                          | 9.0209                                 | ACAN          | -2.7391     | 0.0465               | 6.448                           | 7.9593                                 |
| EP4E3        | 2.8319      | 0.0052               | 7.0262                          | 6.0244                                 | STR26       | 2.0534      | 0.0239               | 8.9742                          | 7.5632                                 | ICOS            | -8.8068     | 0.0058               | 2.9203                          | 6.0589                                 | LRRK1         | -2.1226     | 0.0007               | 8.1143                          | 9.2002                                 |
| CCDC131      | 2.4902      | 0.0256               | 6.592                           | 5.2758                                 | MAGEC1      | 9.4116      | 0.0108               | 9.1958                          | 5.9613                                 | ADAM23          | -3.3993     | 0.0138               | 8.1925                          | 9.9577                                 | CYP11A1       | -2.6169     | 0.0153               | 5.8029                          | 7.1908                                 |
| HRS99//ZNF81 | 2.39        | 0.0247               | 10.1811                         | 8.9241                                 | DMD         | 2.2421      | 0.0174               | 5.5526                          | 4.8878                                 | FAR2P1          | -4.155      | 0.0286               | 4.7174                          | 6.7723                                 | X11TL         | -3.5521     | 0.0182               | 6.7721                          | 8.6129                                 |
| ISAM9        | 2.4976      | 0.0221               | 9.5593                          | 8.2496                                 | RFXDC2      | 10.3874     | 0.0106               | 8.2885                          | 4.8938                                 | POTEF           | -11.6344    | 0.0131               | 3.8913                          | 7.4315                                 | YFEL7         | -2.8449     | 0.0047               | 6.7047                          | 7.9942                                 |
| RABL3        | 2.1059      | 0.0152               | 8.4266                          | 7.3026                                 | DVDC2       | 2.6771      | 0.0152               | 7.9098                          | 6.1891                                 | POTEF           | -6.617      | 0.0217               | 3.0746                          | 5.7642                                 | AGM38         | -2.0116     | 0.0181               | 8.9211                          | 6.8296                                 |
| WDR56        | 2.1171      | 0.0108               | 7.2282                          | 6.086                                  | PNLRP9      | 6.3812      | 0.0152               | 9.1921                          | 6.5183                                 | GRB14           | -2.9486     | 0.0453               | 4.3949                          | 5.8949                                 | TMEM5         | -2.0887     | 0.0072               | 9.4301                          | 10.5596                                |
| ITGB5        | 2.041       | 0.0134               | 10.3682                         | 9.3689                                 | FAM1189A    | 2.3601      | 0.0374               | 9.1417                          | 7.9151                                 | RFTN1           | -2.2929     | 0.0114               | 6.5773                          | 7.7392                                 | MUC10         | -4.7798     | 0.0445               | 4.1346                          | 5.6599                                 |
| TMCC1        | 2.0668      | 0.0239               | 7.4889                          | 6.4297                                 | SORBS1      | 2.14        | 0.0384               | 8.0507                          | 6.9631                                 |                 |             |                      |                                 |                                        |               |             |                      |                                 |                                        |

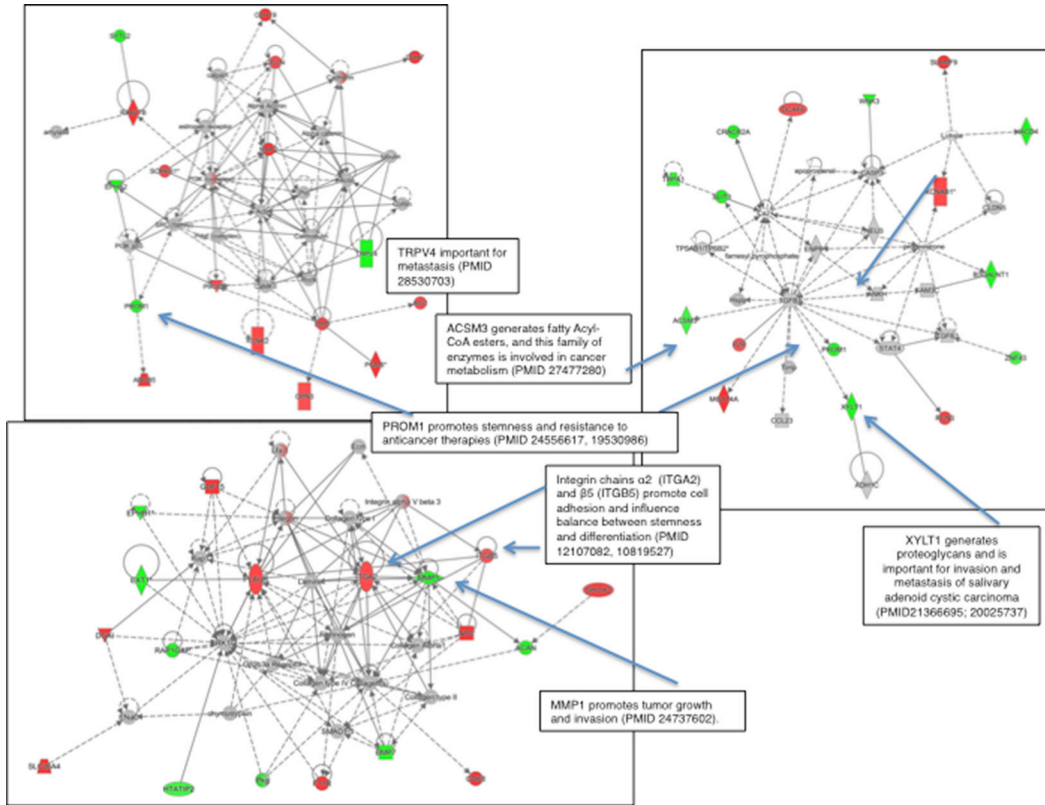

**Supplementary Figure 6: Signaling pathway analyses conducted with QIAGEN's Ingenuity pathway analysis (Ingenuity Systems).** Green indicates down-regulated transcripts and red indicates up-regulated transcripts in SELENOK-deficient cells compared to wild-type SK-MEL-28 cells.

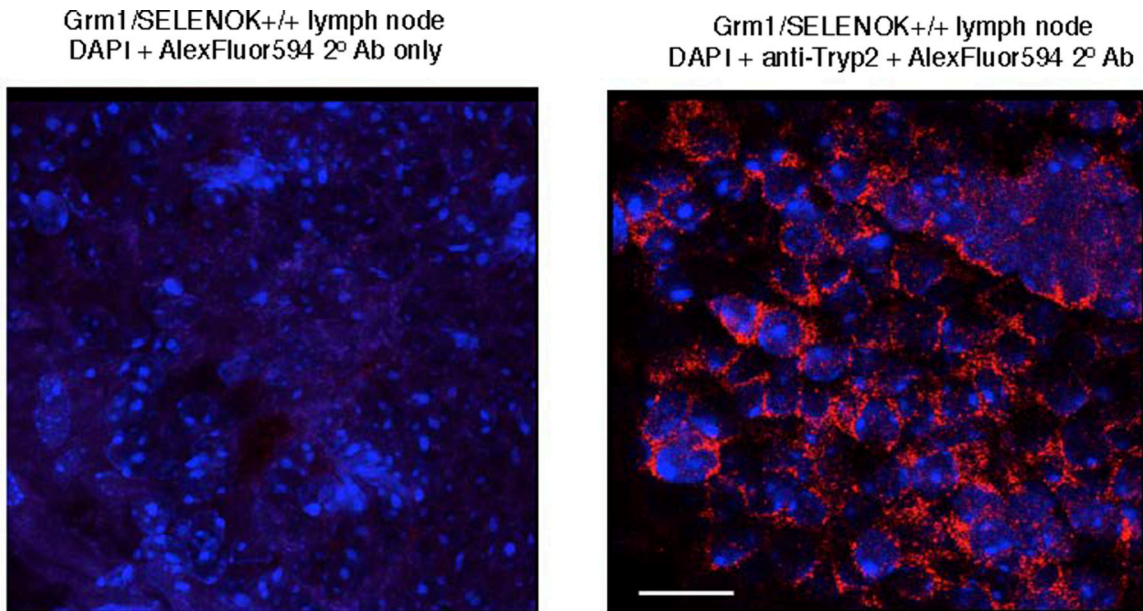

**Supplementary Figure 7: Specific immunofluorescence staining using anti-Trp2, scalebar = 20 μm.** Blue staining are DAPI-positive nuclei and red cytosolic staining is Trp2 antigen. Supplementary video 1 shows mice at 6 months of age that exhibit a lack of melanoma (Grm1-Tg/SELENOK<sup>-/-</sup>) or high levels of melanoma (Grm1-Tg/SELENOK<sup>+/-</sup>). As shown in the video, the mice with high tumor burden are not severely affected in terms of movement or healthy behavior. Several cohorts of both sexes were followed out to the age of 8 months and no increased tumor formation were found in the Grm1-Tg/SELENOK<sup>-/-</sup> mice.

**Supplementary Video 1: Video showing tumors in 8 month-old mouse.** See Supplementary\_Video 1
